# Supplementary material
Source: Springer Nature journal article supplement (https://www.springermedizin.de/resource/supplementary/12885_2007_819_MOESM5_ESM.pdf/9470408)

Figure 5

(a) NFkB

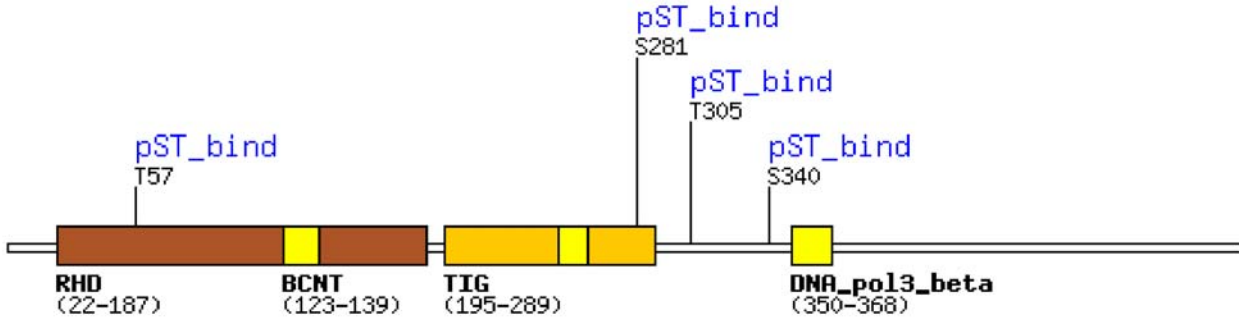

(b) β-catenin

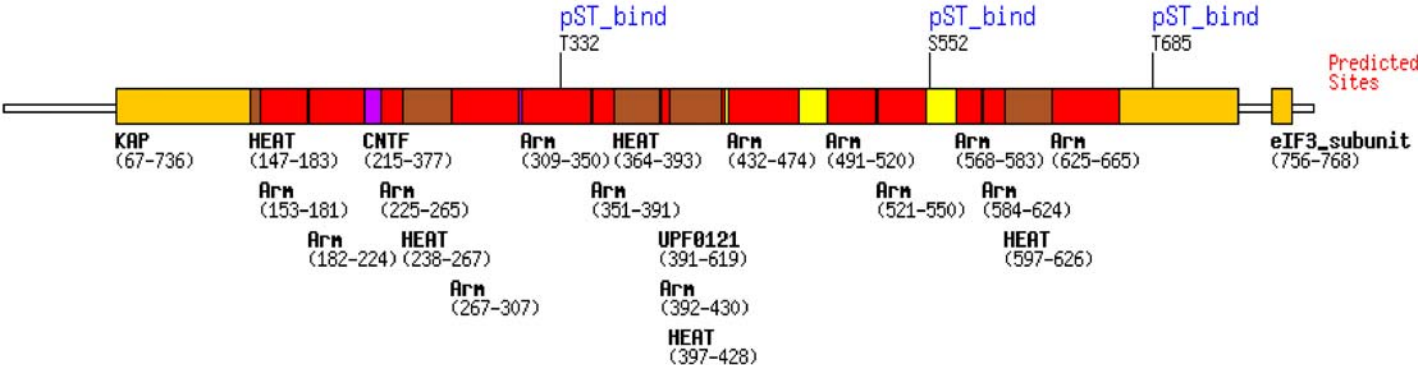

(c) Bcl-2

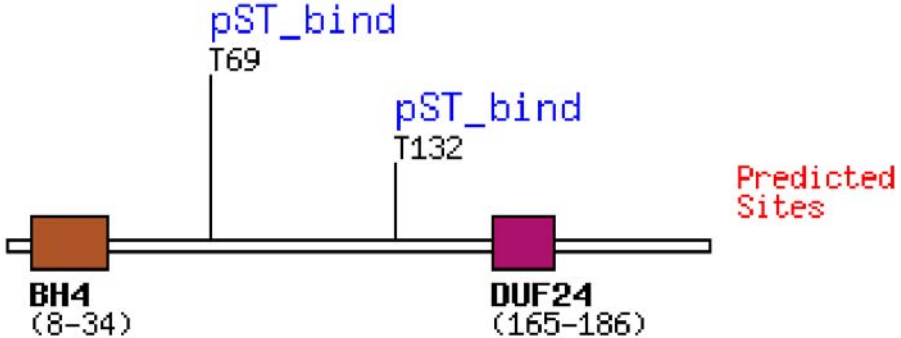

Supplement: MOESM5 [file 9470408]
